# Supplementary material for: Architecture design of nitrogen-doped 3D bubble-like porous graphene for high performance sodium ion batteries
Source: Royal Society of Chemistry journal article supplement (doi:10.1039/c7qi00574a), 2017-01-01
Supplement: c7qi00574a1.pdf [file c7qi00574a1.pdf]

## *Supporting Information*

# **Architecture design of nitrogen-doped 3D bubble-like porous graphene for high performance sodium ion batteries**

Yun Qiao,<sup>a, b</sup> Xiaoguang Cheng,<sup>a, b</sup> Yang Liu,\*<sup>a</sup> Ruimin Han,<sup>a, b</sup> Mengyue Ma,<sup>a, b</sup>  
Qingling Li,<sup>a, b</sup> Hongyu Dong,<sup>a, b</sup> Xiangnan Li,<sup>a, b</sup> and Shuting Yang\*<sup>a, b</sup>

<sup>a</sup> School of Chemistry and Chemical Engineering, Henan Normal University,  
Xinxiang 453007, China

<sup>b</sup> National and Local Joint Engineering Laboratory of Motive Power and Key  
Materials, Xinxiang 453007, China

Corresponding Author

\*E-mail: liuy986@163.com, liuy986@htu.edu.cn; (Yang Liu)

\*E-mail: shutingyang@foxmail.com. (Shuting Yang)

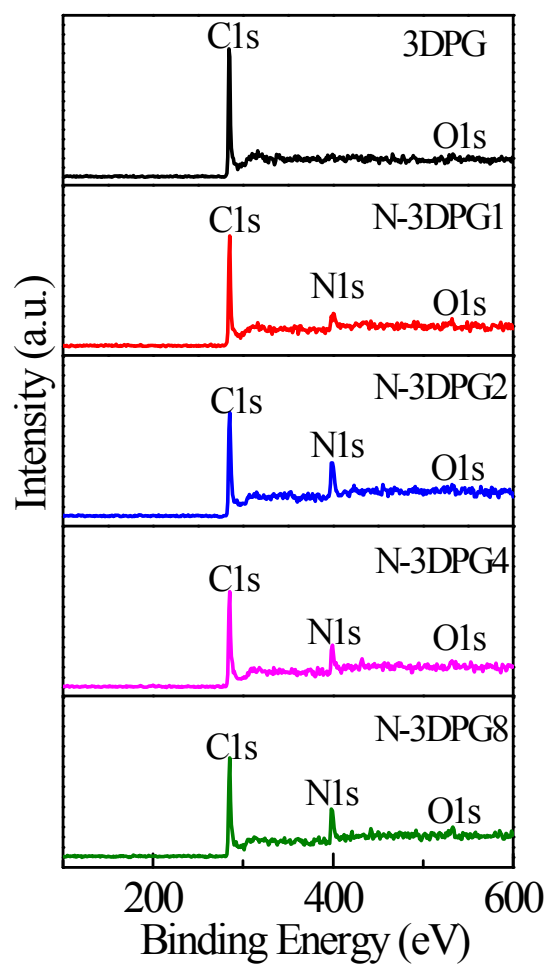

**Fig. S1** X-ray photoelectron survey spectra of the samples.

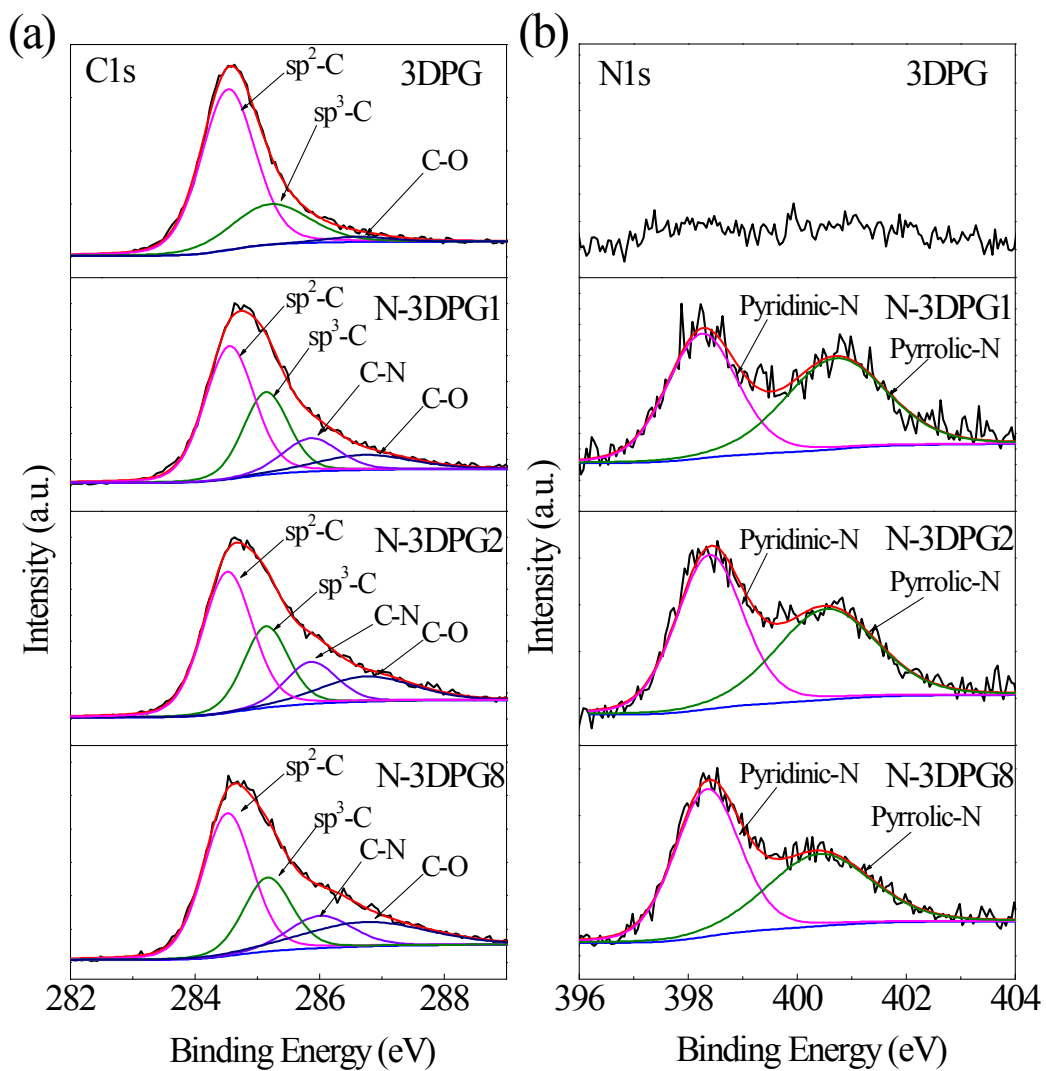

**Fig. S2** High-resolution (a) C1s spectra and (b) N1s of the samples.

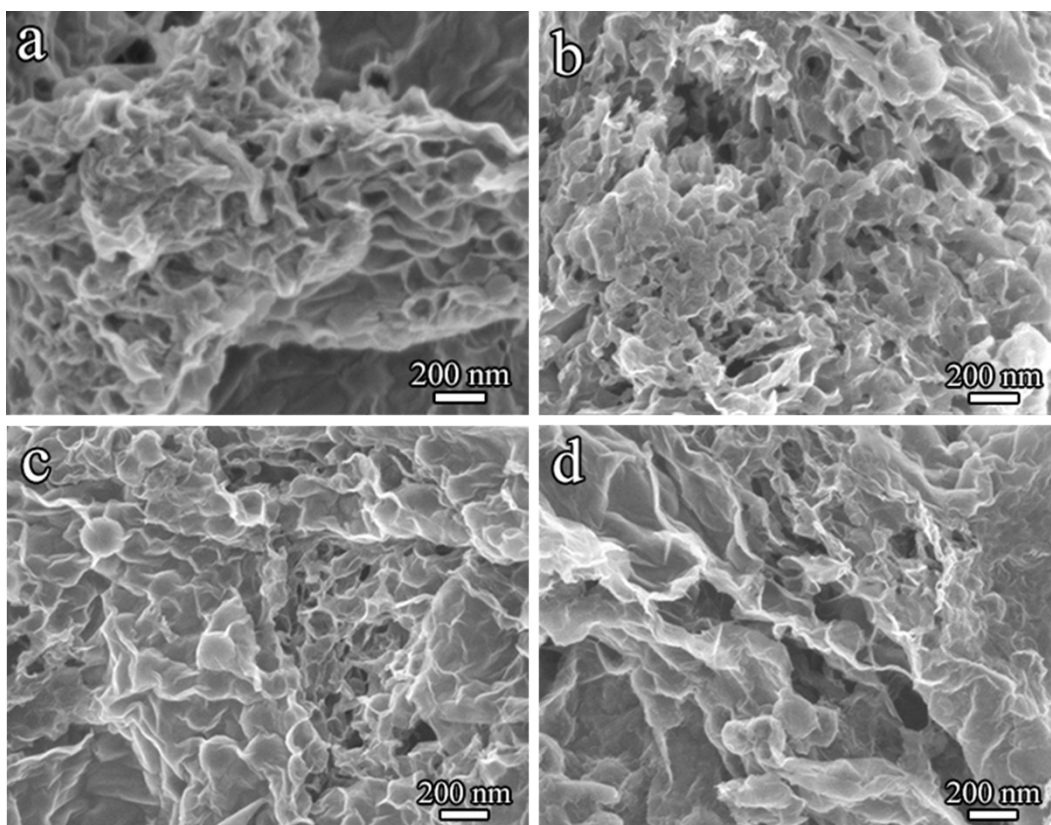

**Fig. S3** FESEM images of (a) 3DPG, (b) N-3DPG1, (c) N-3DPG2 and (d) N-3DPG8.

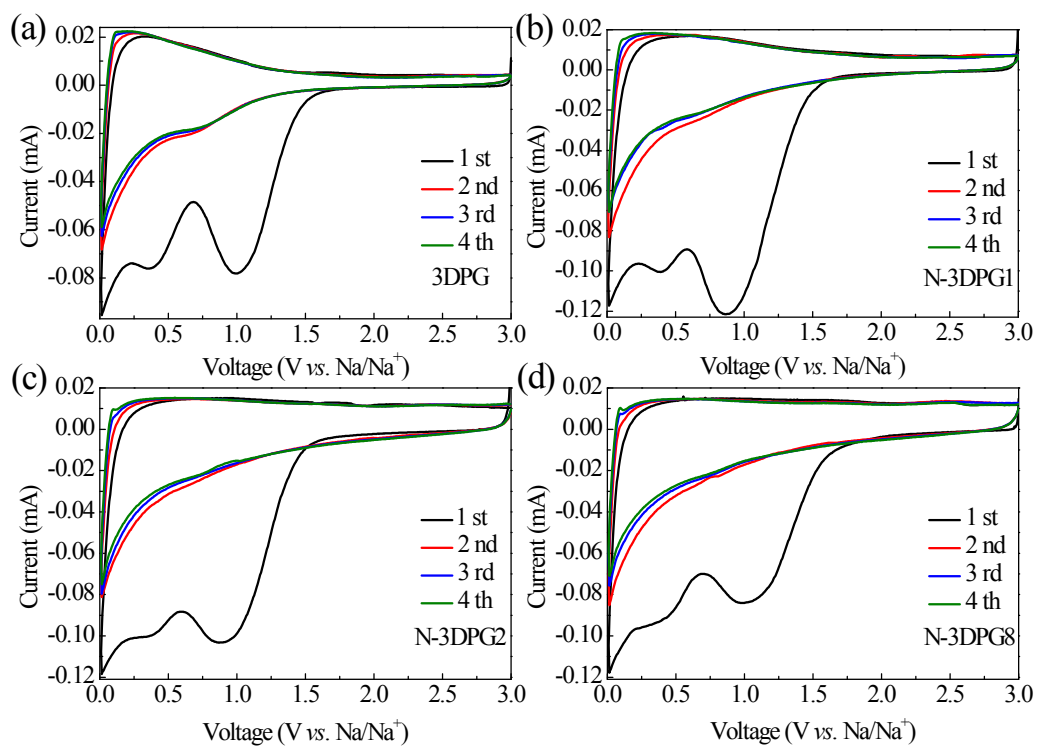

**Fig. S4** Cyclic voltammograms curves in the potential range of 0.0–3.0 V vs. Na/Na<sup>+</sup> at a scan rate of 0.2 mV s<sup>-1</sup> for (a) 3DPG, (b) N-3DPG1, (c) N-3DPG2 and (d) N-3DPG8, respectively.

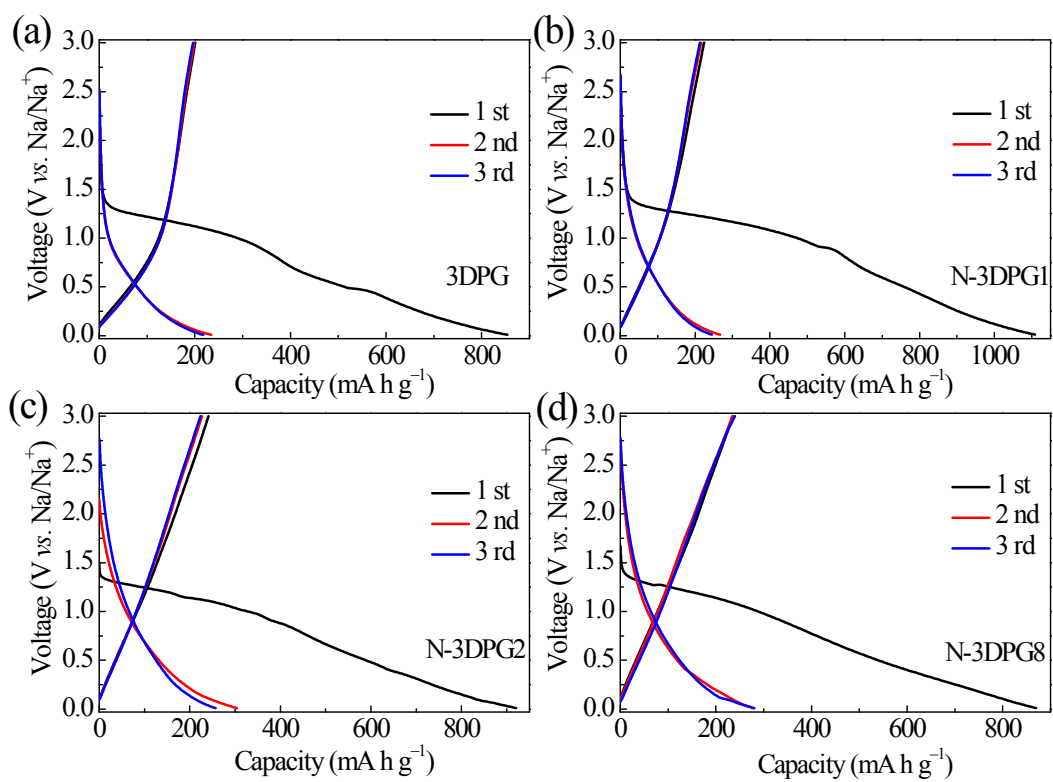

**Fig. S5** Galvanostatic charge-discharge profiles at  $0.2 \text{ A g}^{-1}$  for (a) 3DPG, (b) N-3DPG1, (c) N-3DPG2 and (d) N-3DPG8, respectively.

**Table S1** The measured parameters of the samples from XRD and EDS analyses.

| Samples | $d_{002}$ (nm) | C<br>(wt%) | N<br>(wt%) | O<br>(wt%) |
|---------|----------------|------------|------------|------------|
| 3DPG    | 0.339          | 94.0       |            | 6.0        |
| N-3DPG1 | 0.34           | 73.8       | 18.2       | 8.1        |
| N-3DPG2 | 0.341          | 71.79      | 20.51      | 7.70       |
| N-3DPG4 | 0.341          | 71.43      | 22.35      | 6.22       |
| N-3DPG8 | 0.342          | 69.46      | 20.86      | 9.68       |
